# Supplementary material for: Correlation between preparation conditions and the photoluminescence properties of Sn2+ centers in ZnO–P2O5 glasses
Source: Royal Society of Chemistry journal article supplement (doi:10.1039/c3tc32259a), 2014-01-01

### Supplemental Figure 1

PLE spectra of prepared in Ar from  $\text{Zn}_2\text{P}_2\text{O}_7$ ,  $\text{P}_2\text{O}_5$ ,  $(\text{NH}_4)_2\text{HPO}_4$ , and 0.1mol% C-added  $(\text{NH}_4)_2\text{HPO}_4$  starting materials. The starting material did not affect the oxidation of  $\text{Sn}^{2+}$  during the melting process in inert atmosphere. Inset shows energy level diagram of  $\text{Sn}^{2+}$  center in the glasses

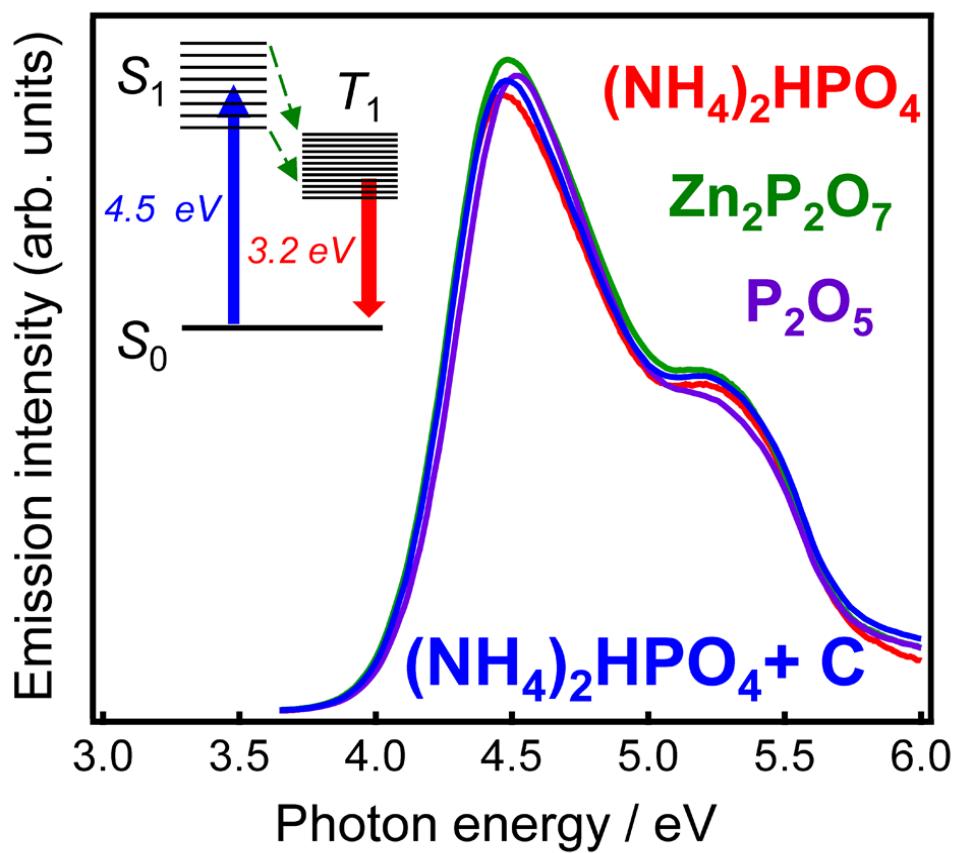

Supplement: c3tc32259a.pdf [file c3tc32259a.pdf]
